# Supplementary material for: Robust catalytically-activated LSM-BCZY-based composite steam electrodes for proton ceramic electrolysis cells
Source: Royal Society of Chemistry journal article supplement (doi:10.1039/c9ra04044g), 2019-01-01
Supplement: c9ra04044g1.pdf [file c9ra04044g1.pdf]

## SUPPORTING INFORMATION

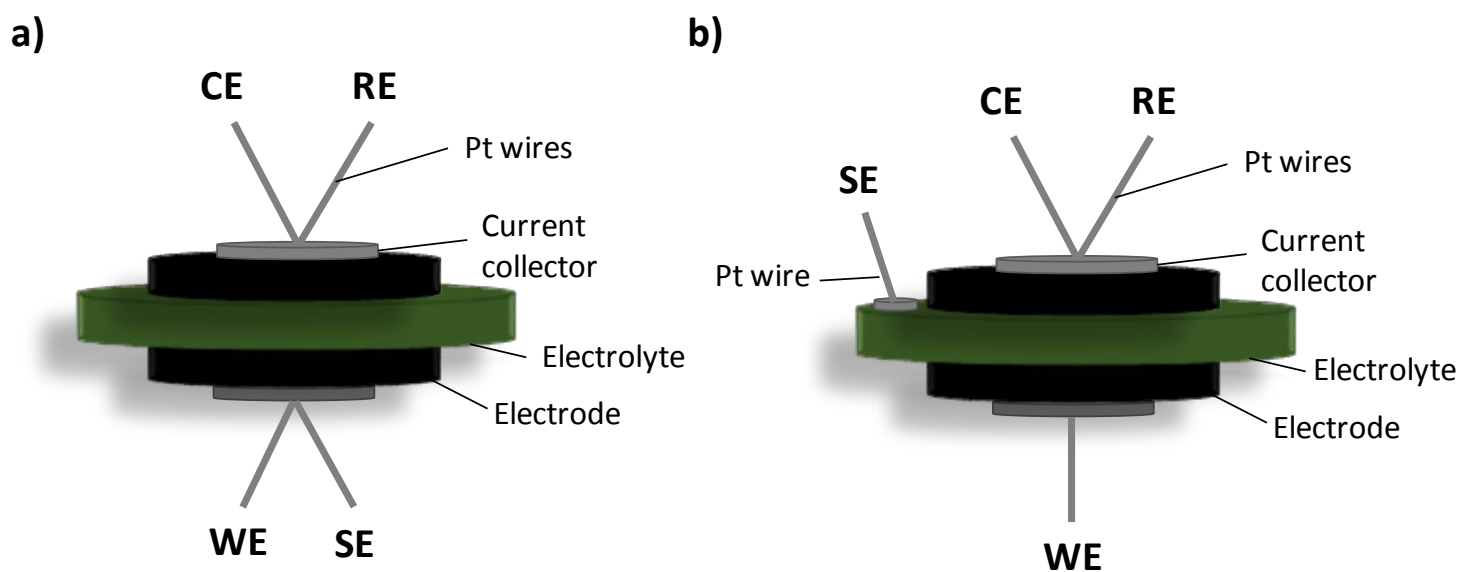

**Supporting Figure S1.** Set-up figures of (a) two and (b) three-wire configuration for measuring electrochemical performance.

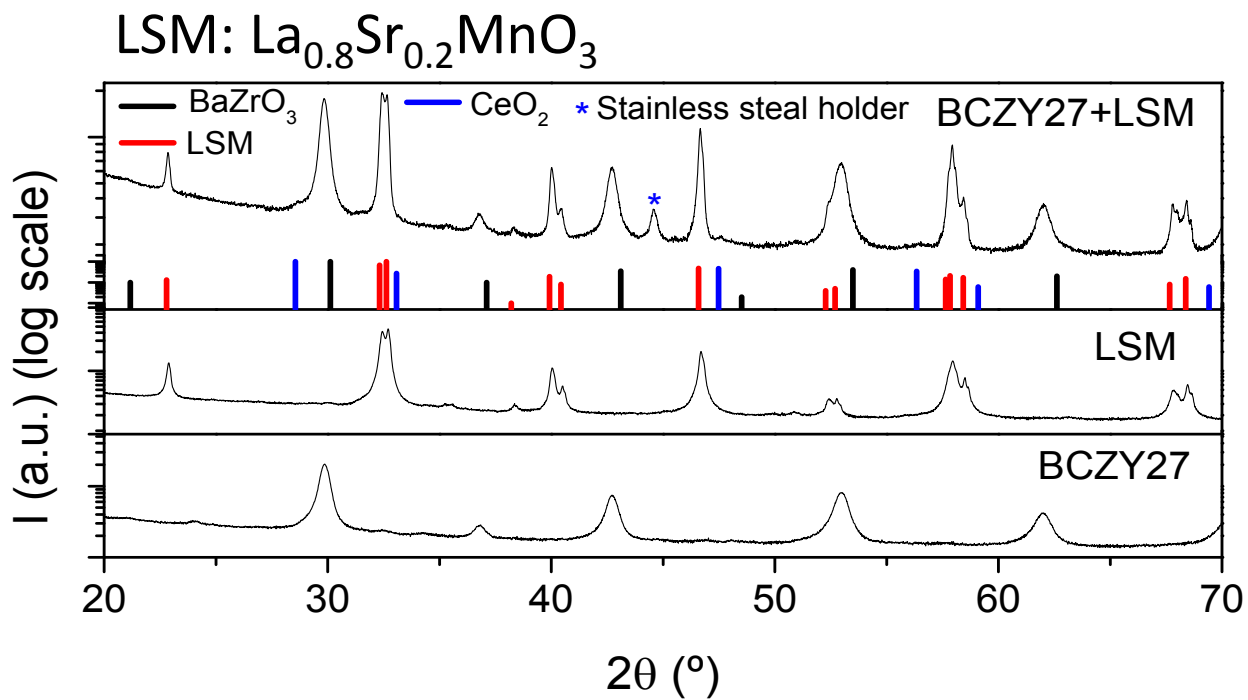

Supporting Figure S2. XRD pattern of the LSM after sintering with BCZY27 at 1100 °C for 2 h.

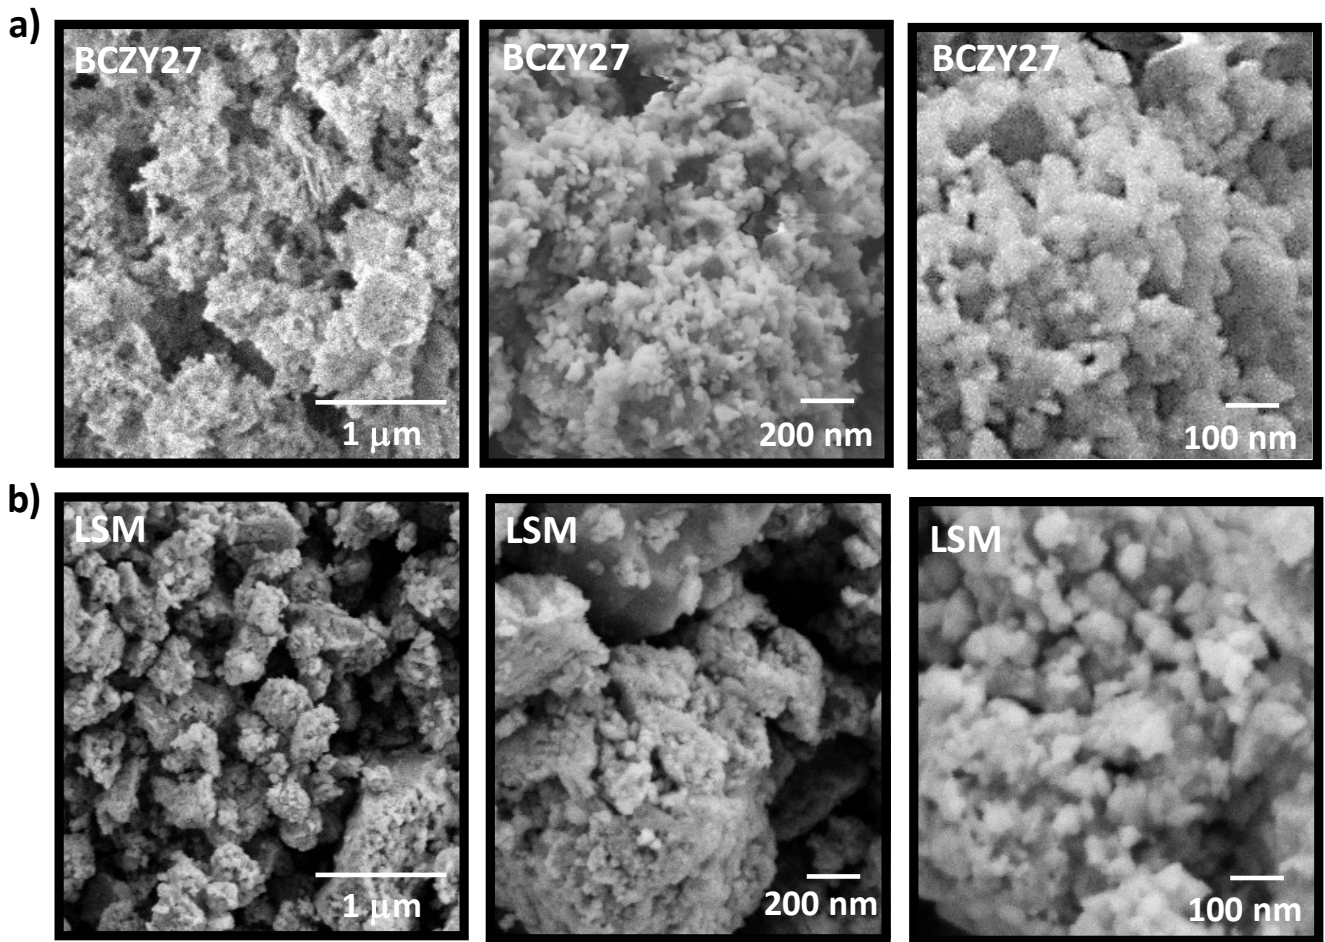

**Supporting Figure S3.** SEM micrographs of (a) BCZY27 and LSM (b) powders for electrode.

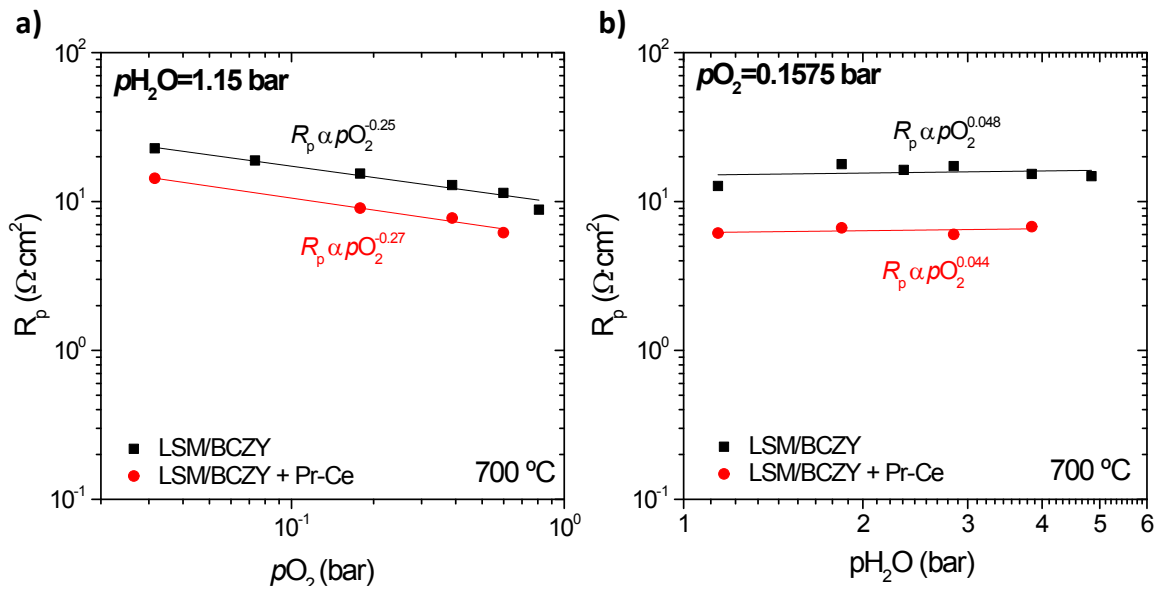

**Supporting Figure S4.**  $R_p$  contributions at 700 °C as a function of: (a)  $p\text{O}_2$  at constant  $p\text{H}_2\text{O} \sim 1.15$  bar; and (b)  $p\text{H}_2\text{O}$  at constant  $p\text{O}_2 \sim 0.1575$  bar of the backbone and infiltrated electrode.

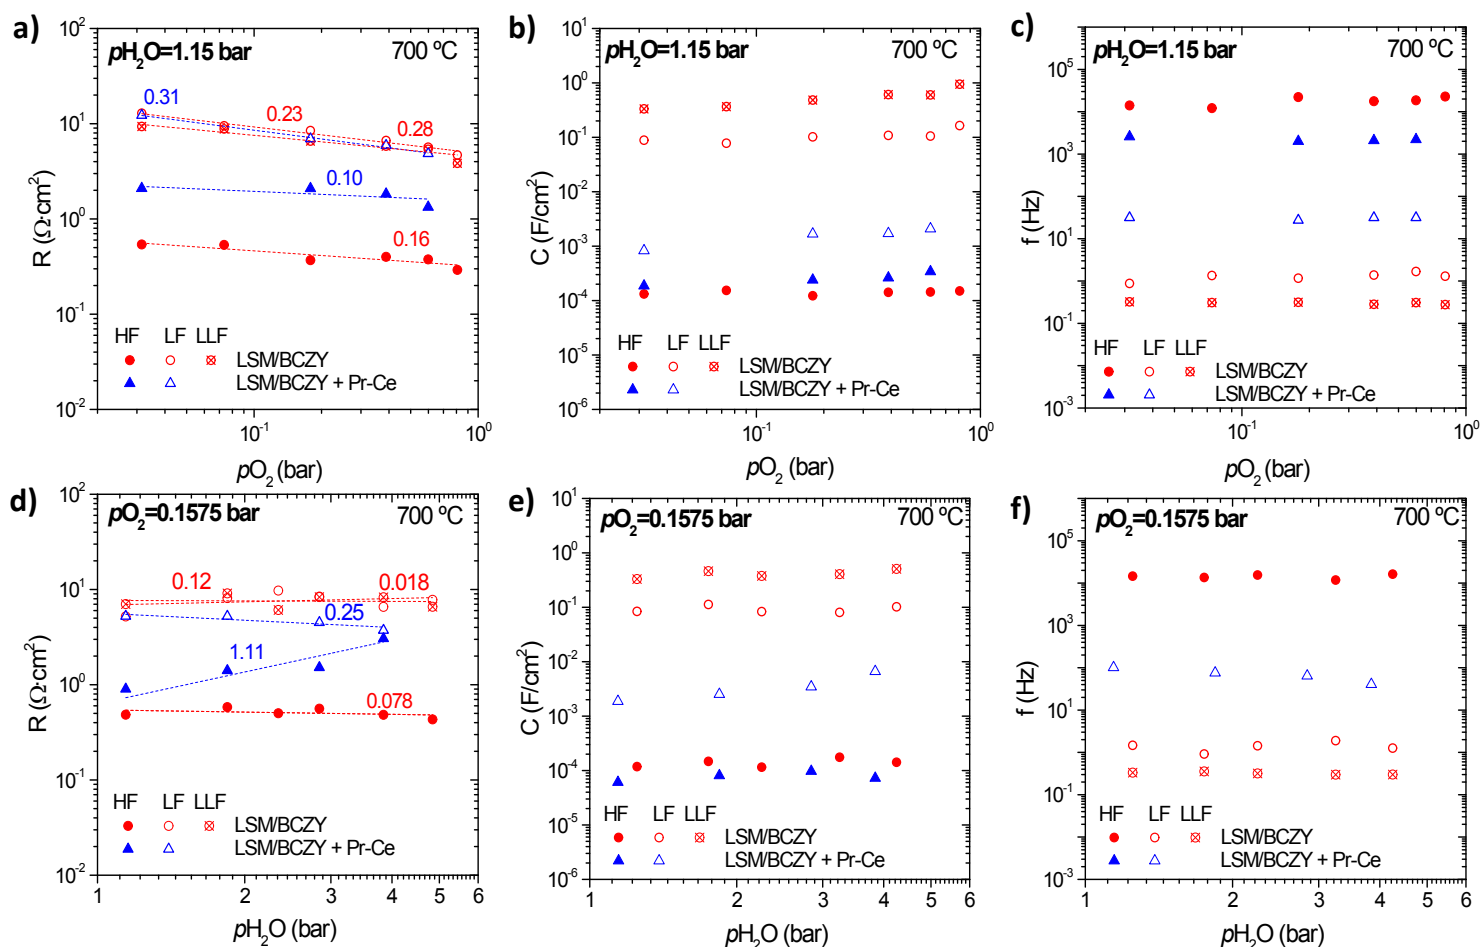

**Supporting Figure S5.**  $R_p$  and HF, LF and LLF contributions of LSM/BCZY27 60/40 vol. % at 700 °C as a function of (a)  $pO_2$  at constant  $pH_2O \sim 1.15$  bar and (c)  $pH_2O$  at constant  $pO_2 \sim 0.1575$  bar.  $R_p$  and HF, MF and LF contributions of LSM/BCZY27 60/40 vol. % infiltrated with  $\text{Pr}_6\text{O}_{11}$ -CeO<sub>2</sub> at 700 °C as a function of: (b)  $pO_2$  at constant  $pH_2O \sim 1.15$  bar and (d)  $pH_2O$  at constant  $pO_2 \sim 0.1575$  bar.

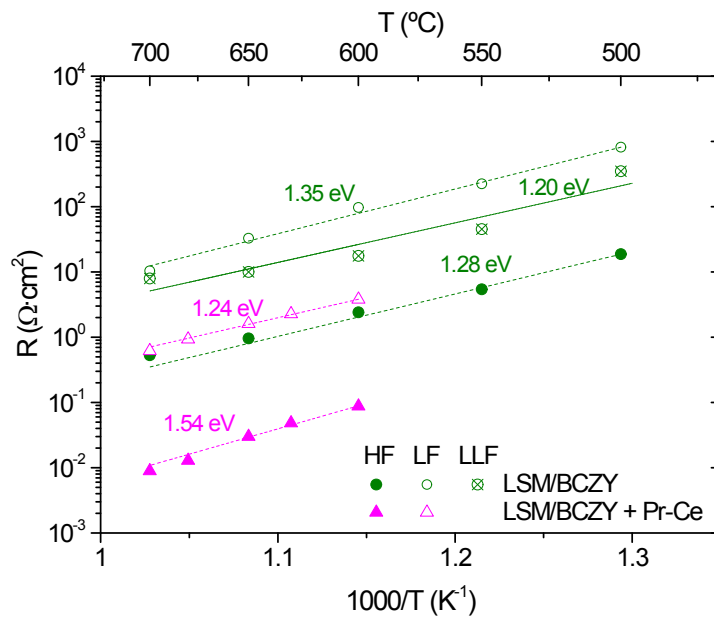

**Supporting Figure S6.**  $R_{HF}$ ,  $R_{LF}$  and  $R_{LLF}$  of LSM/BCZY backbone electrode and the infiltrated with  $\text{Pr}_6\text{O}_{11}\text{-CeO}_2$  at 700 °C and 3 bar of air and steam as a function of  $1000/T$ .

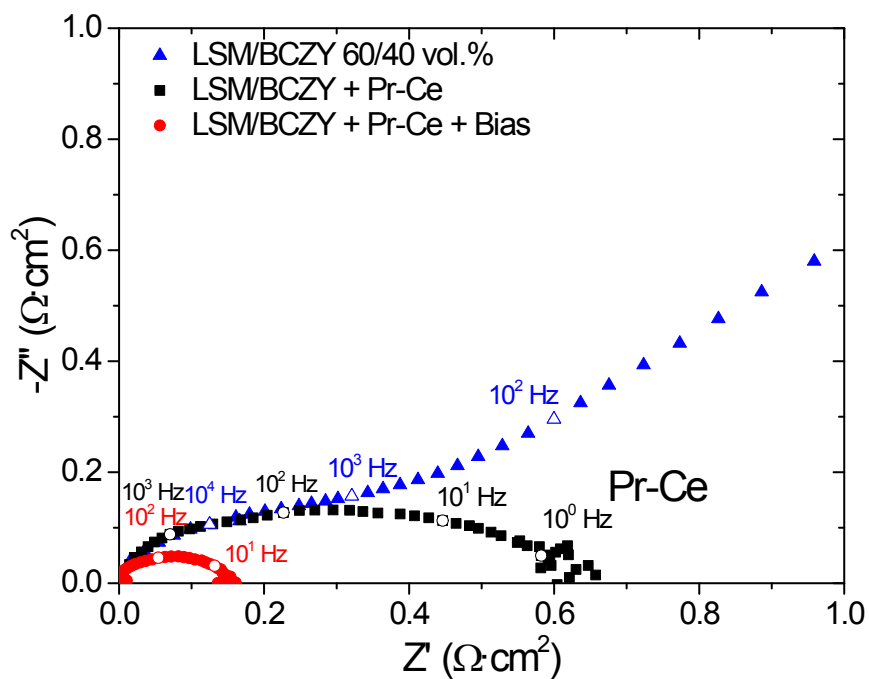

**Supporting Figure S7.** Nyquist plot at 700 °C and 3 bar total pressure ( $p_{\text{Air}}=0.75$  bar and  $p_{\text{H}_2\text{O}}=2.75$  bar) of LSM/BCZY 60/40 vol. % backbone electrode and infiltrated with  $\text{Pr}_6\text{O}_{11}\text{-CeO}_2$  catalytic nanoparticles applying  $0.63 \text{ A}\cdot\text{cm}^{-2}$  of current density.

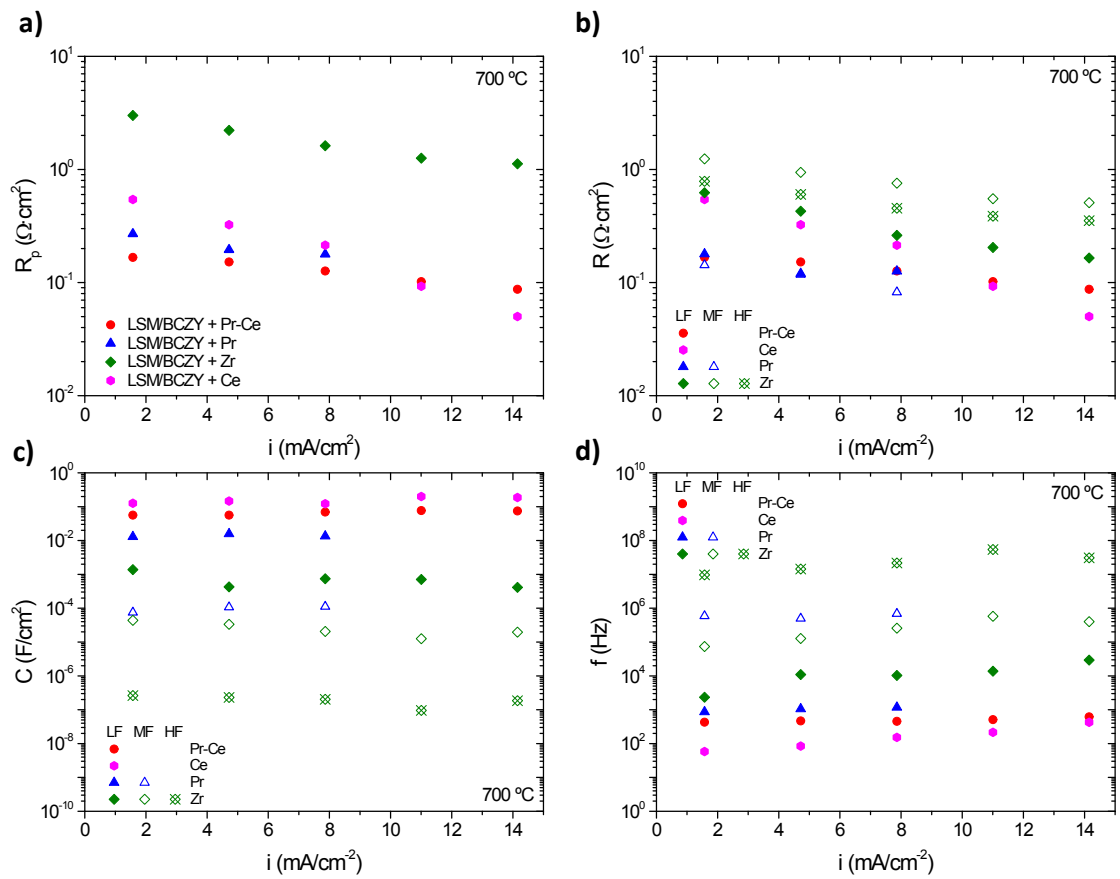

**Supporting Figure S8.** (a)  $R_p$  for the all infiltrations as a function of the applied current at 700 °C and 3 bar total pressure ( $p_{\text{Air}}=0.75$  bar and  $p_{\text{H}_2\text{O}}=2.75$  bar). (b) HF, MF and LF resistances; (c) capacitances and (d) frequencies of the applied current.
